# Supplementary material for: How does graphene grow on complex 3D morphologies?
Source: Royal Society of Chemistry journal article supplement (doi:10.1039/c7cp03207b), 2017-01-01
Supplement: c7cp03207b1.pdf [file c7cp03207b1.pdf]

## Supplementary Material

### How does graphene grow on complex 3D morphologies?

H. T. Chin,<sup>‡a</sup> C. H. Shih,<sup>‡a</sup> Y. P. Hsieh<sup>b</sup>, C. C. Ting<sup>a</sup>, J. N. Aoh<sup>c</sup> and M. Hofmann<sup>d\*</sup>

a. Graduate of Institute of Opto-Mechatronics, National Chung Cheng University, Chia-Yi, 62102, Taiwan.

b. Institute of Atomic and Molecular Sciences, Academia Sinica, Taipei, 10617, Taiwan

E-mail: yapinglab@gmail.com

c. Department of Mechanical Engineering, National Chung Cheng University, Chia-Yi, 62102, Taiwan.

d. Department of Physics, National Taiwan University, Taipei, Taiwan.

#### Morphology and quality of grown graphene

To confirm the high quality and single-layer thickness of the grown graphene, we transferred it onto silicon wafers with 300nm thermal oxide using Poly(methyl methacrylate) as a supporting polymer as reported previously<sup>1</sup>. Figure S1(a) shows the resulting morphology of graphene. The color contrast indicates individual graphene layers whereas the center exhibits a bilayer region in agreement with previous reports<sup>2</sup>. Raman spectra exhibit a negligible D-Band intensity at 1350cm<sup>-1</sup> (Figure 1(c)) which is a signature of defects.<sup>3</sup> Finally, transmission electron microscopy (TEM) shows thin, continuous layers of graphene and selected area electron diffraction(SAED) indicates that these layers are single-crystalline.

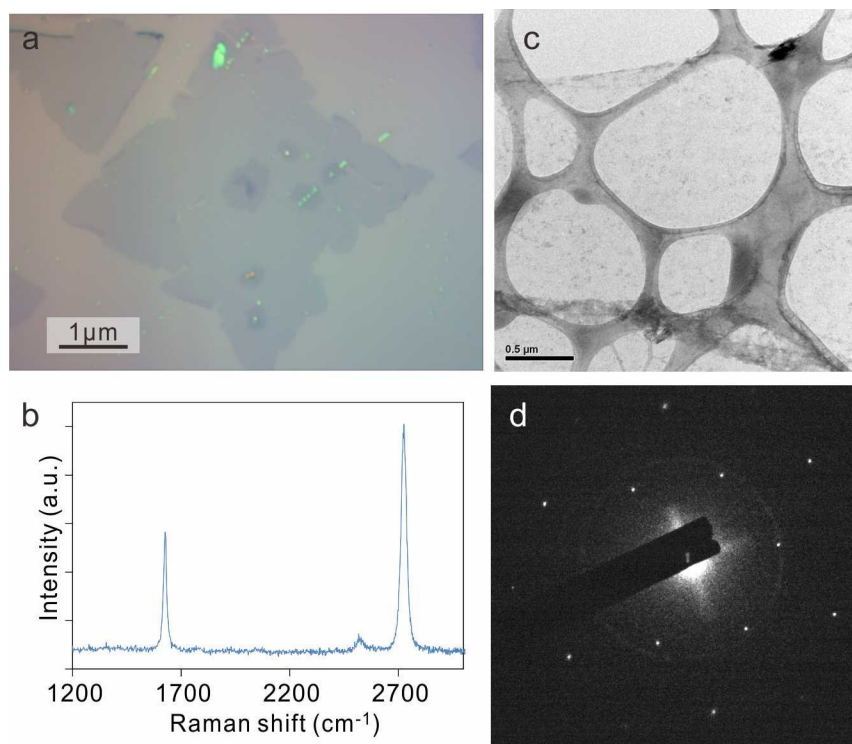

**Figure S1. (a) Optical micrograph of graphene after transfer onto Si/SiO<sub>2</sub> wafer, (b) Raman spectrum, (c) TEM image, (d) selected area electron diffraction pattern**

1. Hsieh, Y.-P.; Kuo, C.-L.; Hofmann, M. *Nanoscale* **2016**, 8, (3), 1327-1331.
2. Chen, T.-W.; Hsieh, Y.-P.; Hofmann, M. *RSC Advances* **2015**, 5, (114), 93684-93688.
3. Saito, R.; Hofmann, M.; Dresselhaus, G.; Jorio, A.; Dresselhaus, M. S. *Adv Phys* **2011**, 60, (3), 413-550.
